# Supplementary material for: Differential methylation and expression patterns of microRNAs in relation to breast cancer subtypes among American women of African and European ancestry
Source: PubMed Central journal article supplement (PMC8009363; doi:10.1371/journal.pone.0249229), 2021-03-30

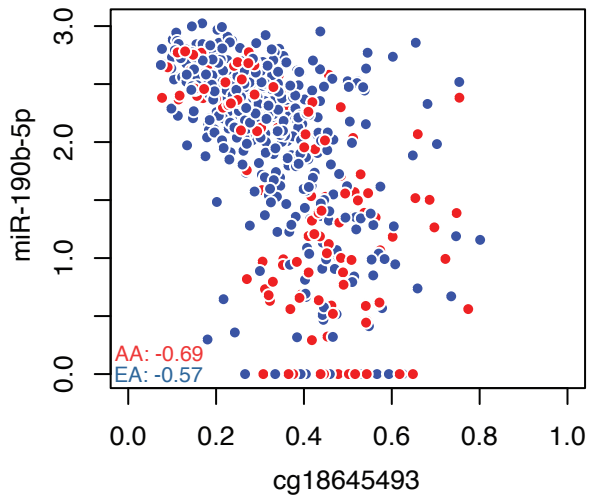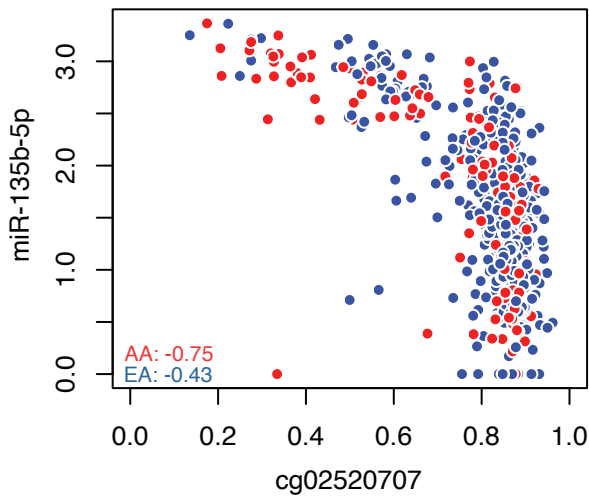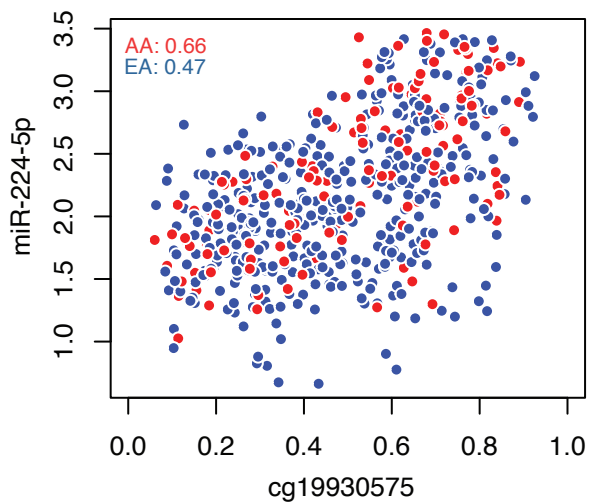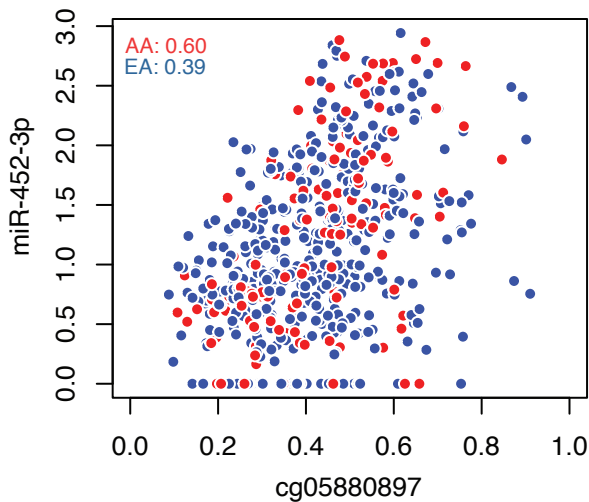

Supplement: pone.0249229.s007.pdf [file pone.0249229.s007.pdf]
